# Supplementary material for: Improving Pd-C catalysts via heteroatom doping for the dehydrogenation of formic acid: a non-noble-metal modulation strategy
Source: Royal Society of Chemistry journal article supplement (doi:10.1039/d3nj01188g), 2023-01-01
Supplement: d3nj01188g1.pdf [file d3nj01188g1.pdf]

## *Supporting information*

# **Improving Pd-C Catalysts *via* Heteroatom Doping for the Dehydrogenation of Formic Acid: A Non-Noble Metal Modulation Strategy**

## **1. Chemicals**

All chemicals were commercially available and used without further purification. Ketjenblack (KB, EC-600JD, Japanese lion), potassium tetrachloropalladite ( $K_2PdCl_4$ , Shanghai Macklin Biochemical industry Park, Shanghai, China, >32.6%), nickel (II) nitrate hexahydrate ( $Ni(NO_3)_2 \cdot 6H_2O$ , Sinopharm Chemical Reagent Co., Ltd. >98.0%), iron (III) nitrate nonahydrate ( $Fe(NO_3)_3 \cdot 9H_2O$ , Sinopharm Chemical Reagent Co., Ltd. >98.5%), cobalt chloride hexahydrate ( $CoCl_2 \cdot 6H_2O$ , Shanghai Macklin Biochemical Co., Ltd. AR), manganese(II) nitrate tetrahydrate ( $MnN_2O_6 \cdot 4H_2O$ , Shanghai Aladdin Biochemical Technology Co., Ltd. >98%), formic acid ( $CH_2O_2$ , Sinopharm Chemical Reagent Co., Ltd. >98%), sodium borohydride ( $NaBH_4$ , Sinopharm Chemical Reagent Co., Ltd. >98%), L-arginine ( $C_6H_{14}N_4O_2$ , Shanghai Macklin Biochemical Co., Ltd. >98%), and sodium formate ( $CHNaO_2$ , Shanghai Aladdin Biochemical Technology Co., Ltd. >99.5%), were used as received. De-ionized (DI) water was obtained by a reverse osmosis followed by the ion-exchange and filtration.

## **2. Instrumentation and methods**

Powder X-ray diffraction patterns were collected on a D8 ADVANCE with Cu-K $\alpha$  radiation (40 kV 40 mA).  $N_2$  adsorption/desorption isotherms were obtained at 77 K using automatic volumetric adsorption equipment (NOVA3000e). The metal contents of the catalyst were analyzed by an inductively coupled plasma optical emission spectroscopy (ICP-OES) on Thermo Fisher iCAP PRO (OES). X-ray photoelectron spectroscopic (XPS) spectra were recorded on a Thermo Scientific ESCALAB Xi+ using Al K $\alpha$  source. The transmission electron microscopic (TEM) and high-annular dark-field scanning TEM (HAADF-STEM) images were collected on FEI Talos F200x with the operating voltage at 200 kV. Elemental analyses were performed on Elementar Unicube instruments. Fourier Transform Infrared Spectrometer (FT-IR) analyses were carried out on a Nicolet 380 in air mode. Gas Chromatography (GC) results were analyzed by a FULI 9790 II

instrument with N<sub>2</sub> as the carrier gas.

### 3. Syntheses

**3.1.1 Synthesis of Pd<sub>x</sub>Ni<sub>y</sub>/KB<sub>LA</sub>:** Taking Pd<sub>0.95</sub>Ni<sub>0.05</sub>/KB<sub>LA</sub> as an example, an aqueous mixture containing 1.74 mL of LA (0.1 g mL<sup>-1</sup>), 0.285 mL of K<sub>2</sub>PdCl<sub>4</sub> (0.1 M) and 0.15 mL of Ni(NO<sub>3</sub>)<sub>2</sub>·6H<sub>2</sub>O (0.01 M) were firstly diluted to 10 mL with water and sonicated for 5 min. Then, 30 mg of KB carbon was added and sonicated for 10 min to get a homogeneous mixture. This mixture was then stirred at room temperature overnight. Subsequently, 1.0 mL of freshly prepared NaBH<sub>4</sub> solution (1.32 M) was injected into the above mixture and stirred at room temperature for another 90 min. Finally, the solid was collected by centrifugation, washed with water for three times, and directly used as the catalysts for formic acid dehydrogenation.

Keeping the total metal amount at 0.03 mmol, other Pd<sub>x</sub>Ni<sub>y</sub>/KB<sub>LA</sub> with different ratios of metals were prepared by a similar process, except for the usage of metals (the x and y instead for the molar percentage of Pd and Ni, respectively).

To study the effects of supports and surface modifier, control samples with different usage of KB and LA have also been synthesized.

**3.1.2 Synthesis of Pd<sub>0.95</sub>M<sub>0.05</sub>/KB<sub>LA</sub> (M = Co, Mn, Fe):** The synthesis process was the same as Pd<sub>0.95</sub>Ni<sub>0.05</sub>/KB<sub>LA</sub>, except for the use of other metal salts (Fe(NO<sub>3</sub>)<sub>3</sub>·9H<sub>2</sub>O, CoCl<sub>2</sub>·6H<sub>2</sub>O, MnN<sub>2</sub>O<sub>6</sub>·4H<sub>2</sub>O) in place of Ni(NO<sub>3</sub>)<sub>2</sub>·6H<sub>2</sub>O during the catalyst preparation.

## 4. Measurements for catalytic performance

### 4.1 Procedure for FA dehydrogenation

In general, 2.0 mL dispersion of as-prepared catalyst in water was placed in 30 mL two-necked round-bottom flask which was placed in a water bath at the preset temperature (30, 40, 50, and 60 °C). A SQB Wet-Gas flow meter was connected to the reaction flask to measure the volume of released gas. The reaction started when 1.0 mL of mixed aqueous solution containing FA (3 M) and SF of different molar ratios (0, 3, 6, and 7.5 M) was injected into the mixture using a syringe. The molar ratio of n<sub>Ni+Pd</sub>/n<sub>FA</sub> was theoretically fixed at 0.01 for all catalytic reactions except for the notes in the manuscript. The volume of the evolved gas was monitored by the Wet-Gas flow meter automatically.

### 3.2.2 Durability testing of Pd<sub>0.95</sub>Ni<sub>0.05</sub>/KB<sub>LA</sub>

The durability testing for Pd<sub>0.95</sub>Ni<sub>0.05</sub>/KB<sub>LA</sub> was performed at 50 °C. The testing process was the same as the description in 3.2.1. After each cycle, the catalyst was washed by DI-water for 3 times and reused for the next cycle.

### 4.3 Calculation methods

The turnover frequency (TOF) reported here is an apparent TOF value based on the number of metal atoms (Pd+Ni) in catalysts, which is calculated from the equation as follow:

$$TOF = P_0V/(2RTn_Mt)$$

Where  $P_0$  is the atmospheric pressure (101325 Pa),  $V$  is the final generated volume of gas (H<sub>2</sub>+CO<sub>2</sub>),  $R$  is the universal gas constant (8.3145 m<sup>3</sup> Pa mol<sup>-1</sup> K<sup>-1</sup>),  $T$  is the room temperature (298 K),  $t$  is the completion time of the reaction in hour, and  $n_M$  is the total number of metal atoms (Pd+Ni) in catalysts.

## 5. Figures and tables

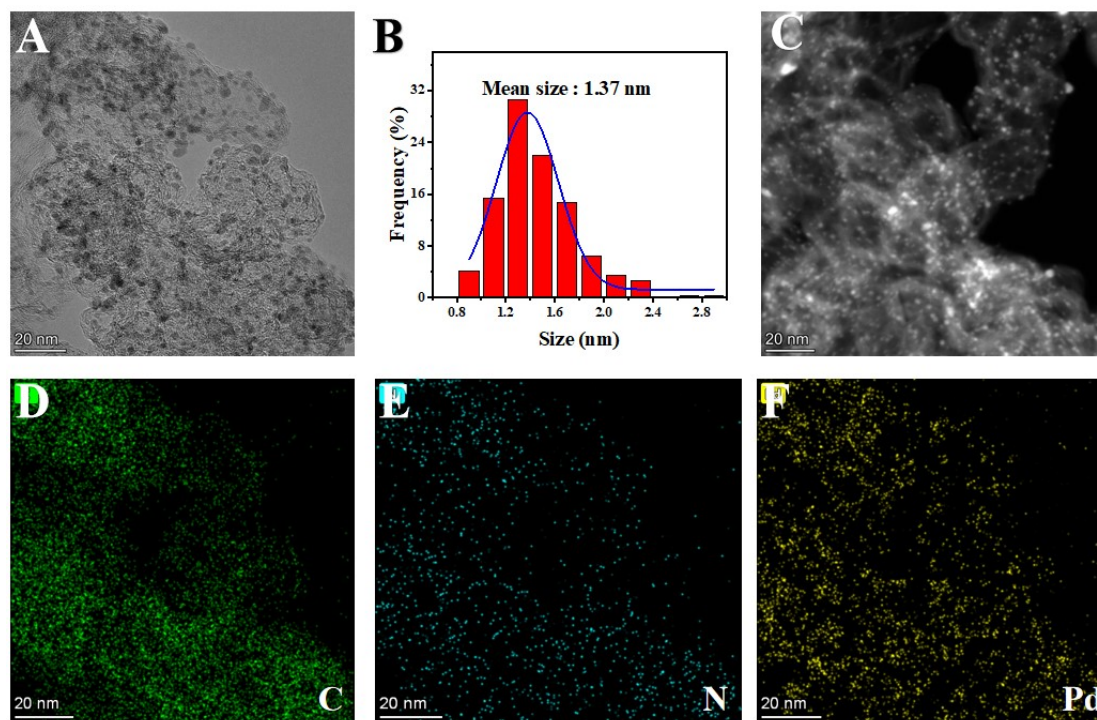

**Figure S1.** The TEM (A), particle size distribution (B), HADDF-STEM (C), corresponding element mapping (D-F) images of Pd/KB<sub>LA</sub>.

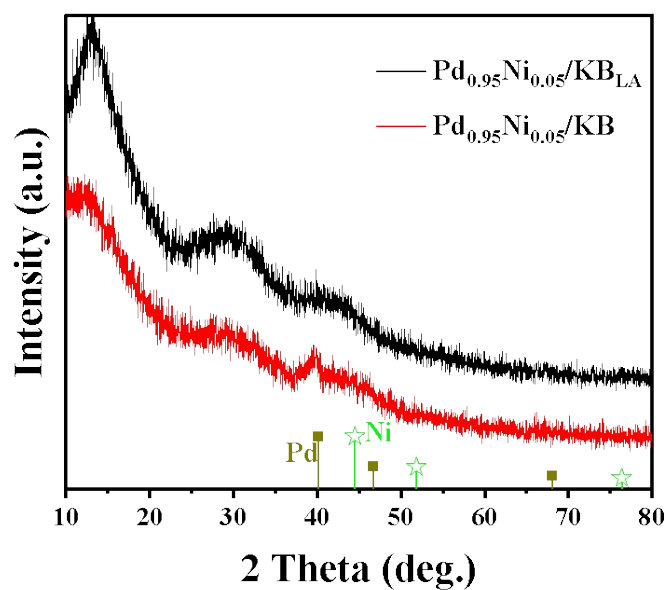

**Figure S2.** XRD patterns of Pd<sub>0.95</sub>Ni<sub>0.05</sub>/KB<sub>LA</sub> and Pd<sub>0.95</sub>Ni<sub>0.05</sub>/KB. The small peak at about 40° for Pd<sub>0.95</sub>Ni<sub>0.05</sub>/KB suggested the larger particle size of metal NPs.

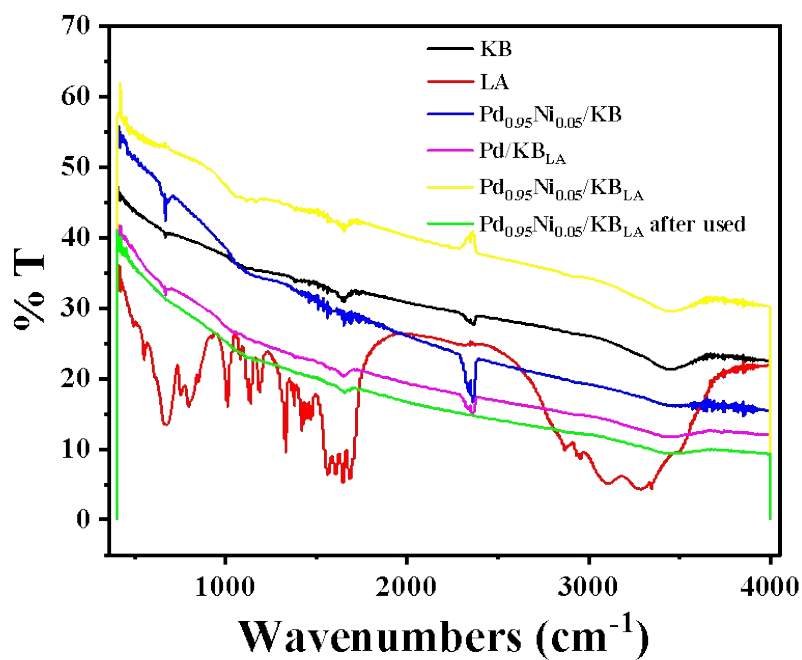

**Figure S3.** FT-IR spectra of KB, LA, Pd<sub>0.95</sub>Ni<sub>0.05</sub>/KB, Pd/KB<sub>LA</sub>, Pd<sub>0.95</sub>Ni<sub>0.05</sub>/KB<sub>LA</sub> and Pd<sub>0.95</sub>Ni<sub>0.05</sub>/KB<sub>LA</sub> after used.

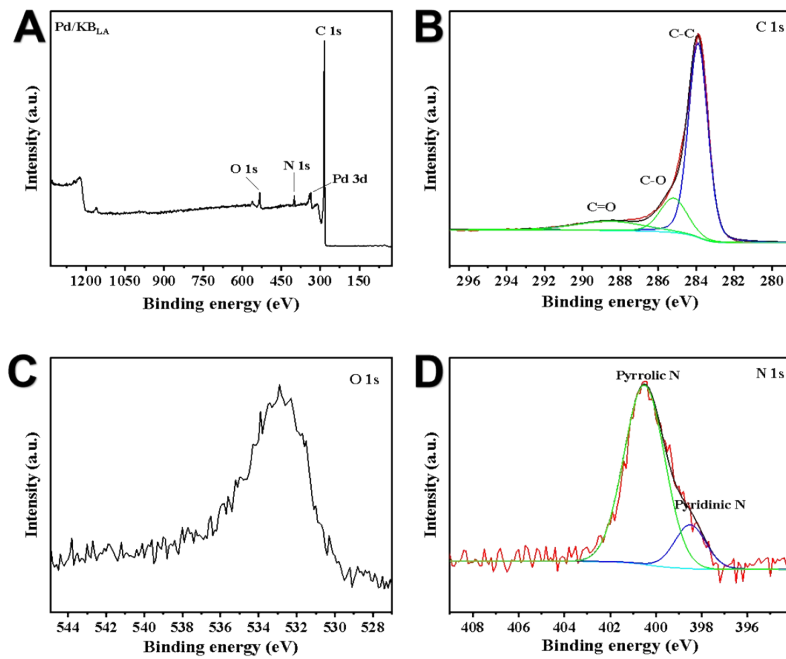

**Figure S4.** The XPS spectra of Pd/KB<sub>LA</sub>: survey (A), O 1s (B), C 1s (C) and N 1s (D).

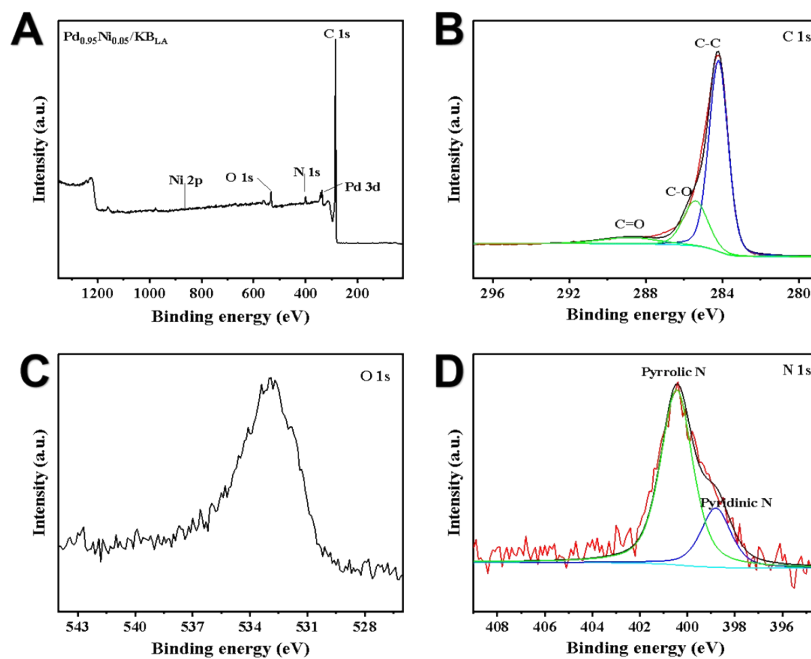

**Figure S5.** The XPS spectra of Pd<sub>0.95</sub>Ni<sub>0.05</sub>/KB<sub>LA</sub>: survey (A), O 1s (B), C 1s (C) and N 1s (D).

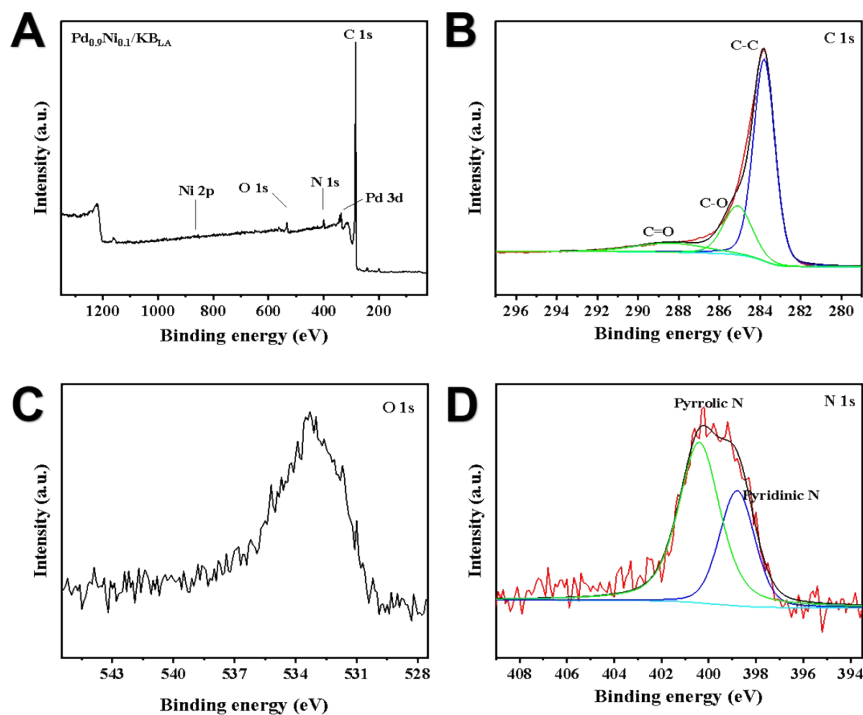

**Figure S6.** The XPS spectra of Pd<sub>0.9</sub>Ni<sub>0.1</sub>/KB<sub>L</sub>A: survey (A), O 1s (B), C 1s (C) and N 1s (D).

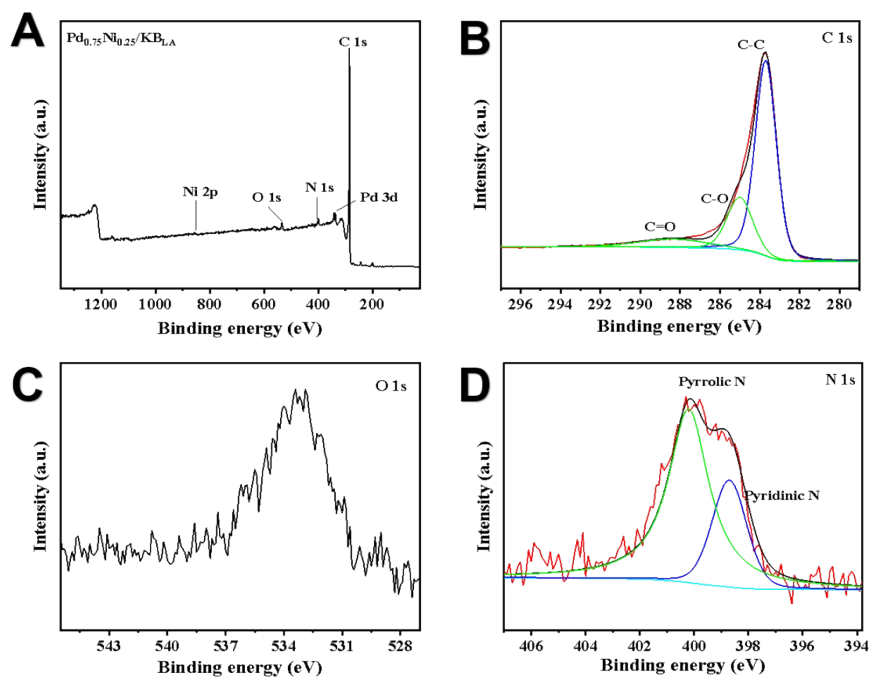

**Figure S7.** The XPS spectra of Pd<sub>0.75</sub>Ni<sub>0.25</sub>/KB<sub>L</sub>A: survey (A), O 1s (B), C 1s (C) and N 1s (D).

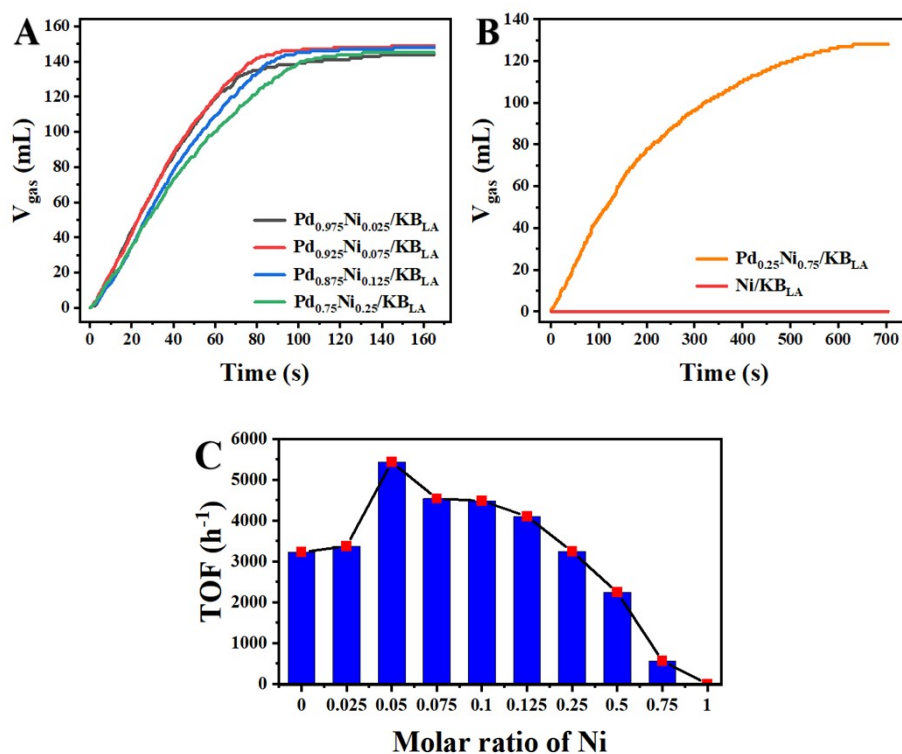

**Figure S8.** The volume of the generated gas ( $\text{CO}_2+\text{H}_2$ ) *versus* time for the dehydrogenation of FA/SF solution over catalysts with different Pd/Ni ratios (A, B), and the corresponding TOF values (C) ( $T = 50\text{ }^\circ\text{C}$ ,  $[\text{Pd}+\text{Ni}] = 0.01\text{ M}$ ,  $[\text{FA}] = 1.0\text{ M}$  and  $[\text{SF}] = 2.5\text{ M}$  in 3.0 mL aqueous dispersion).

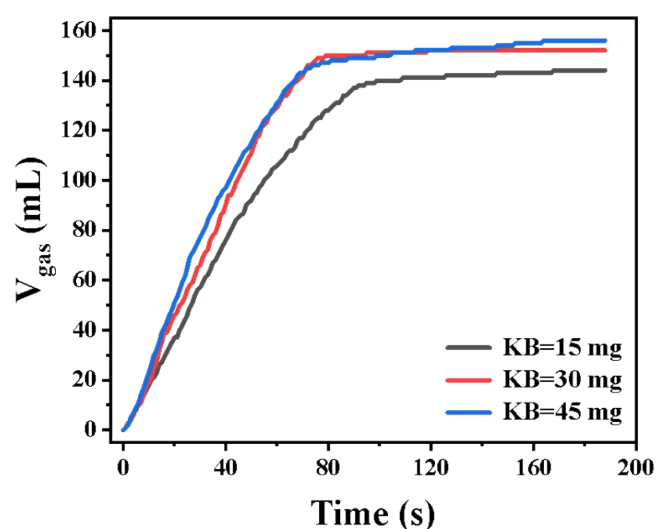

**Figure S9.** The volume of the generated gas ( $\text{CO}_2+\text{H}_2$ ) *versus* time for the dehydrogenation of FA/SF solution over Pd<sub>0.95</sub>Ni<sub>0.05</sub>/KB<sub>LA</sub> with KB of different amounts as the support ( $T = 50\text{ }^\circ\text{C}$ ,  $[\text{Pd}+\text{Ni}] = 0.01\text{ M}$ ,  $[\text{FA}] = 1.0\text{ M}$  and  $[\text{SF}] = 2.5\text{ M}$  in 3.0 mL aqueous dispersion).

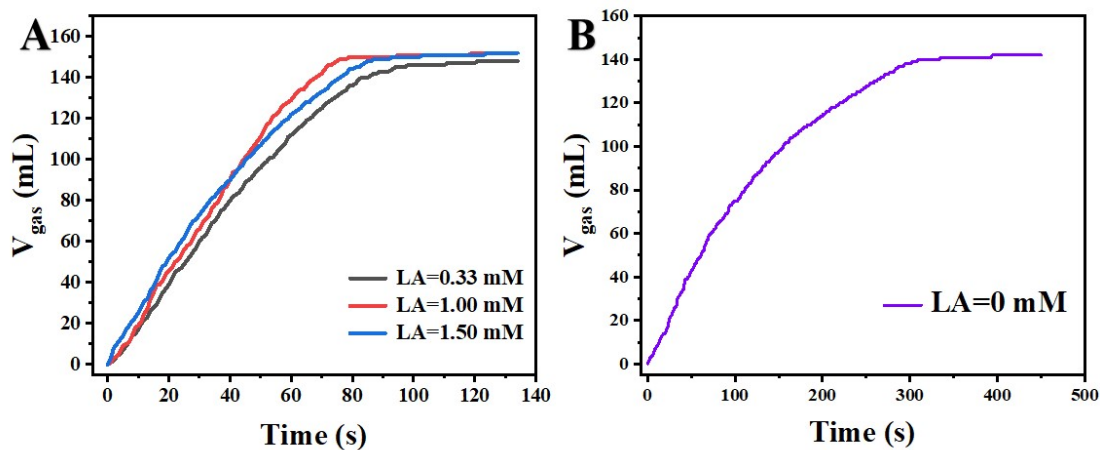

**Figure S10.** The volume of the generated gas ( $\text{CO}_2+\text{H}_2$ ) *versus* time for the dehydrogenation of FA/SF solution over  $\text{Pd}_{0.95}\text{Ni}_{0.05}/\text{KB}_{\text{LA}}$  prepared with LA of different amount ( $T = 50\text{ }^\circ\text{C}$ ,  $[\text{Pd}+\text{Ni}] = 0.01\text{ M}$ ,  $[\text{FA}] = 1.0\text{ M}$  and  $[\text{SF}] = 2.5\text{ M}$  in 3.0 mL aqueous dispersion).

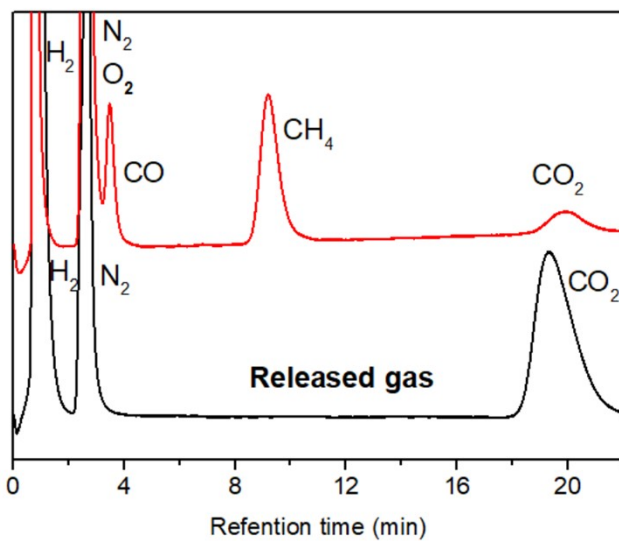

**Figure S11.** GC results of the released gas from the mixture of FA/SF over  $\text{Pd}_{0.95}\text{Ni}_{0.05}/\text{KB}_{\text{LA}}$  ( $[\text{Pd}+\text{Ni}] = 0.01\text{ M}$ ,  $[\text{FA}] = 1.0\text{ M}$  and  $[\text{SF}] = 2.5\text{ M}$  in 3.0 mL aqueous dispersion at  $50\text{ }^\circ\text{C}$ ), showing the presence of only  $\text{H}_2$  and  $\text{CO}_2$ .



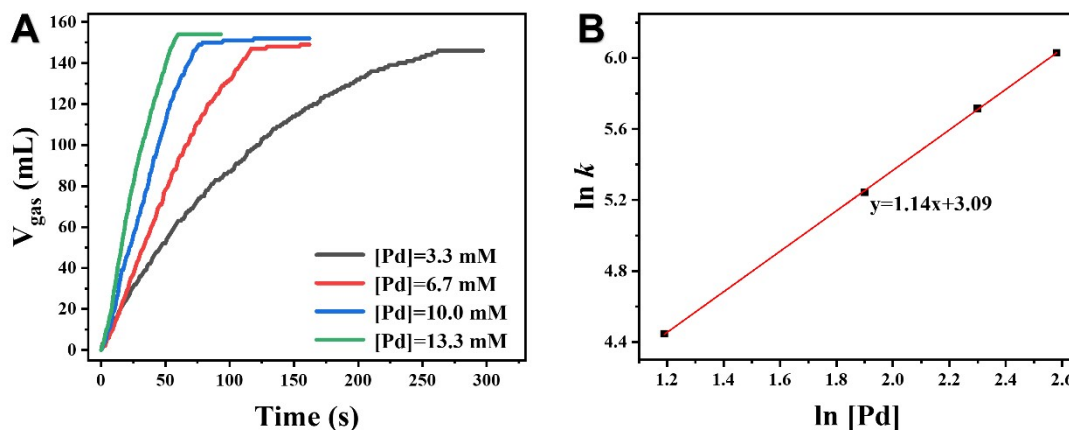

**Figure S12.** The volume of the generated gas ( $\text{CO}_2+\text{H}_2$ ) *versus* time with different (Pd+Ni) concentrations (A), and the plot of the gas generation rate *versus* the (Pd+Ni) concentration (B) (both in logarithmic scale,  $y = 1.14x + 3.09$ ,  $R^2 = 0.99$ ) for the dehydrogenation of FA/SF solution over  $\text{Pd}_{0.95}\text{Ni}_{0.05}/\text{KB}_{\text{LA}}$  ( $T = 50\text{ }^\circ\text{C}$ ,  $[\text{FA}] = 1.0\text{ M}$  and  $[\text{SF}] = 2.5\text{ M}$  in 3.0 mL aqueous dispersion).

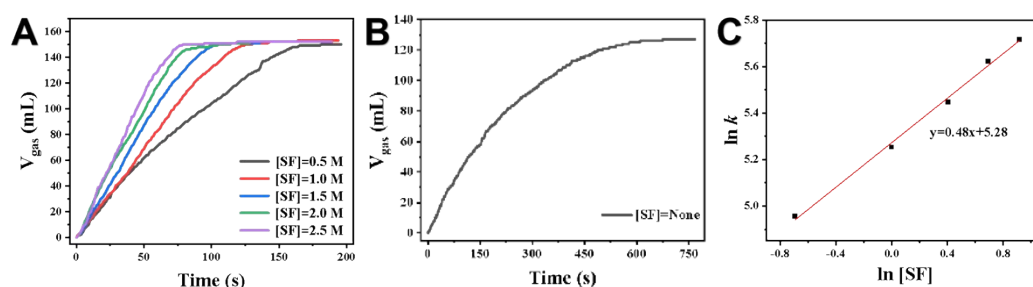

**Figure S13.** The volume of the generated gas ( $\text{CO}_2+\text{H}_2$ ) *versus* time with different SF concentrations (A, B), and the plot of the gas generation rate *versus* the SF concentration (C) (both in logarithmic scale,  $y = 0.48x + 5.28$ ,  $R^2 = 0.97$ ) for the dehydrogenation of FA over  $\text{Pd}_{0.95}\text{Ni}_{0.05}/\text{KB}_{\text{LA}}$  ( $T = 50\text{ }^\circ\text{C}$ ,  $[\text{Pd}+\text{Ni}] = 0.01\text{ M}$  and  $[\text{FA}] = 1.0\text{ M}$  in 3.0 mL aqueous dispersion).

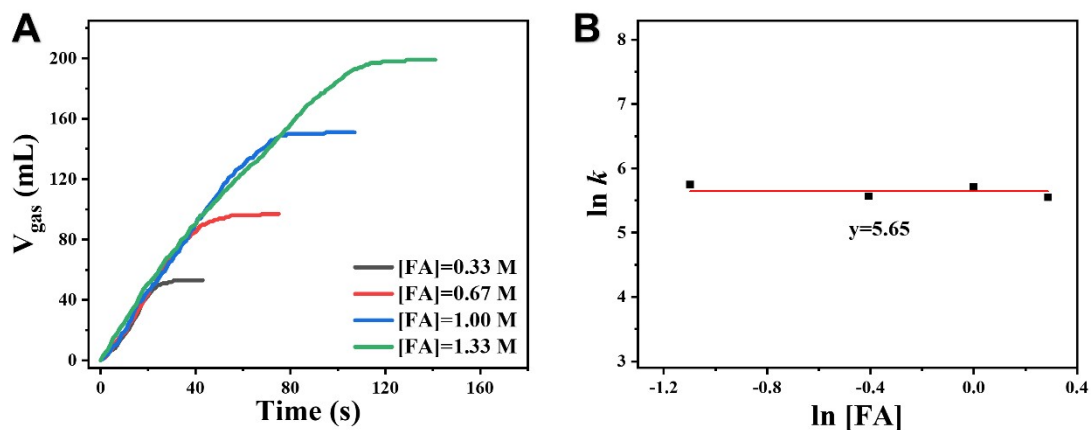

**Figure S14.** The volume of the generated gas ( $\text{CO}_2 + \text{H}_2$ ) *versus* time with different FA concentrations (A), and the plot of the gas generation rate *versus* the FA concentration (B) (both in logarithmic scale) for the dehydrogenation of FA over  $\text{Pd}_{0.95}\text{Ni}_{0.05}/\text{KB}_{\text{LA}}$  ( $T = 50\text{ }^\circ\text{C}$ ,  $[\text{Pd} + \text{Ni}] = 0.01\text{ M}$  and  $[\text{SF}] = 2.5\text{ M}$  in 3.0 mL aqueous dispersion).

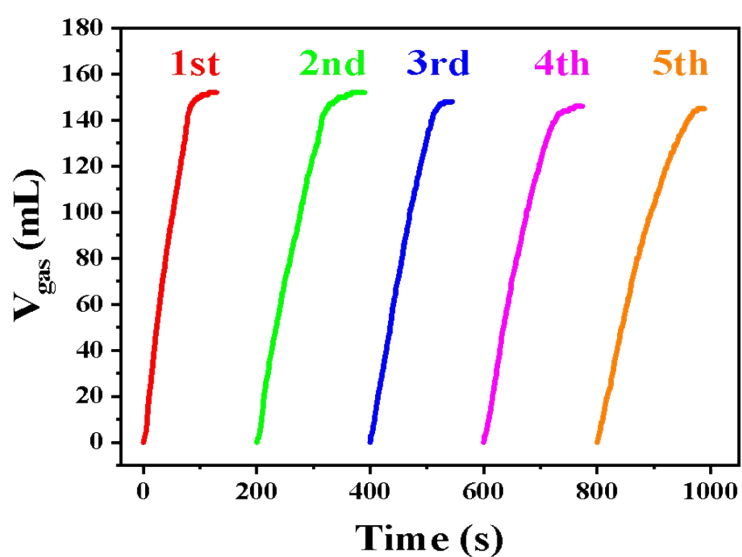

**Figure S15.** Durability test (5 cycles) for the dehydrogenation of FA/SF solution over  $\text{Pd}_{0.95}\text{Ni}_{0.05}/\text{KB}_{\text{LA}}$  ( $T = 50\text{ }^\circ\text{C}$ ,  $[\text{Pd} + \text{Ni}] = 0.01\text{ M}$ ,  $[\text{FA}] = 1.0\text{ M}$  and  $[\text{SF}] = 2.5\text{ M}$  in 3.0 mL aqueous dispersion).

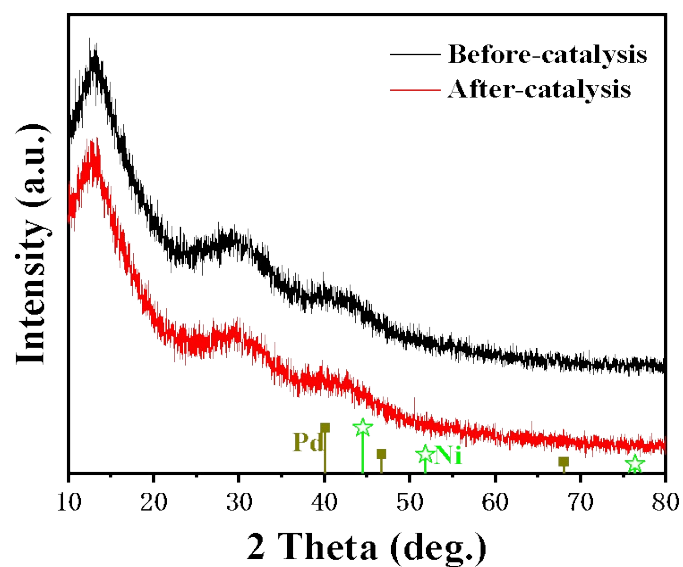

**Figure S16.** The XRD patterns of the Pd<sub>0.95</sub>Ni<sub>0.05</sub>/KB<sub>LA</sub> before and after catalysis.

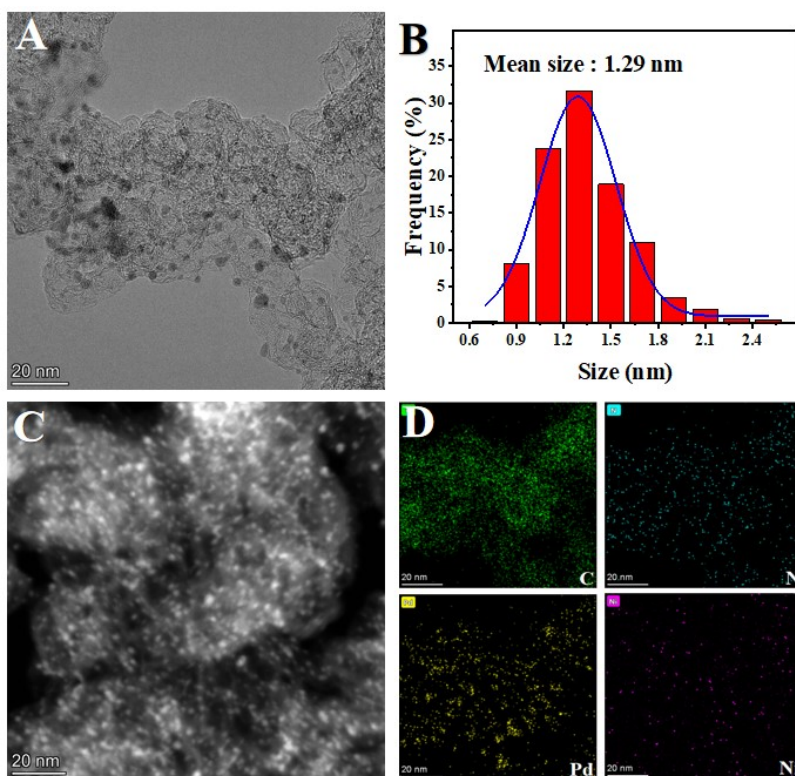

**Figure S17.** The TEM (A), particle size distribution (B), HADDF-STEM (C) and corresponding elemental mapping (D) images of Pd<sub>0.95</sub>Ni<sub>0.05</sub>/KB<sub>LA</sub> after used.

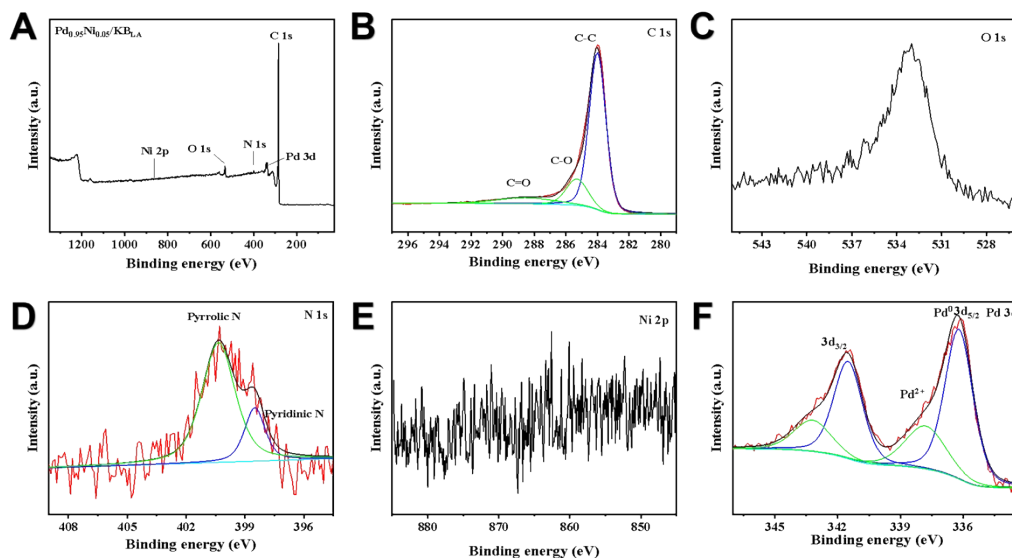

**Figure S18.** XPS spectra of Pd<sub>0.95</sub>Ni<sub>0.05</sub>/KB<sub>LA</sub> after used for FA dehydrogenation: survey (A), O 1s (B), C 1s (C), N 1s (D), Ni 2p (E) and Pd 3d (F).

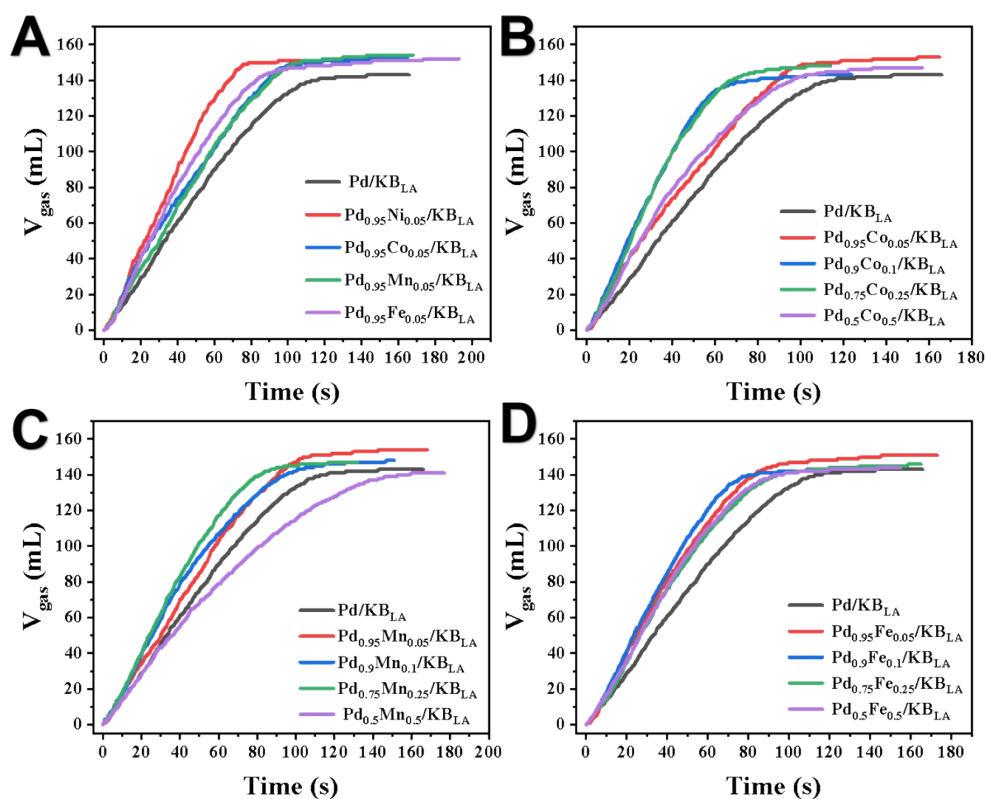

**Figure S19.** The volume of the generated gas (CO<sub>2</sub>+H<sub>2</sub>) *versus* time for the dehydrogenation of FA/SF solution over different catalysts. (A) Comparison of Pd-based catalysts with or without non-noble metals doping; (B-D) the effect of doping percentage for Co (B), Mn (C) and Fe (D) on catalytic performances (T = 50 °C, [Pd+M] = 0.01 M, [FA] = 1.0 M and [SF] = 2.5 M in 3.0 mL aqueous dispersion).

**Table S1.** BET surface areas and pore volumes for the synthesized samples.

| Sample                                                    | Specific surface area / m <sup>2</sup> g <sup>-1</sup> | Pore volume / cm <sup>3</sup> g <sup>-1</sup> |
|-----------------------------------------------------------|--------------------------------------------------------|-----------------------------------------------|
| <b>KB</b>                                                 | 1322.99                                                | 1.35                                          |
| <b>Pd<sub>0.95</sub>Ni<sub>0.05</sub>/KB<sub>LA</sub></b> | 819.67                                                 | 0.89                                          |

**Table S2.** Elemental contents of the samples.

| Sample                                                               | C (wt%) | N (wt%) | H (wt%) |
|----------------------------------------------------------------------|---------|---------|---------|
| <b>Pd/KB<sub>LA</sub></b>                                            | 96.27   | 0.05    | 0.26    |
| <b>Pd<sub>0.95</sub>Ni<sub>0.05</sub>/KB<sub>LA</sub></b>            | 79.61   | 4.74    | 1.91    |
| <b>Pd<sub>0.95</sub>Ni<sub>0.05</sub>/KB<sub>LA</sub> after used</b> | 81.80   | 2.81    | 1.71    |

**Table S3.** ICP results of Pd<sub>0.95</sub>Ni<sub>0.05</sub>/KB<sub>LA</sub> before and after used.

|                 | Before use | After used |
|-----------------|------------|------------|
| <b>Pd (wt%)</b> | 8.15       | 8.38       |
| <b>Ni (wt%)</b> | 0.18       | 0.16       |

**Table S4.** Catalytic activities of latest heterogeneous catalysts for dehydrogenation of formic acid.

| Catalyst                                                                    | T (°C) | Solution | TOF (h <sup>-1</sup> )   | E <sub>a</sub> (kJ mol <sup>-1</sup> ) | Ref.             |
|-----------------------------------------------------------------------------|--------|----------|--------------------------|----------------------------------------|------------------|
| Pd <sub>1</sub> -Ni(OH) <sub>2</sub> /PC                                    | 50     | FA/SF    | 2008 <sup>a*</sup>       | 47.5                                   | 1                |
| PdNi-Pd/C                                                                   | 30     | FA/SF    | 5654 <sup>a#</sup>       | 24.44                                  | 2                |
| Pd <sub>1</sub> Ag <sub>2</sub> /C (PVP/metal = 1)                          | 75     | FA/SF    | 855 <sup>a#</sup>        | ---                                    | 3                |
| Pd/Co@CN                                                                    | 30     | FA/SF    | 1403 <sup>a*</sup>       | ---                                    | 4                |
| Ni@Pd NCs                                                                   | 25     | FA       | 645 <sup>b*</sup>        | --                                     | 5                |
| Pd <sub>0.8</sub> Au <sub>0.2</sub> /UiO-66-(NH <sub>2</sub> ) <sub>2</sub> | 50     | FA/SF    | 3660 <sup>a#</sup>       | 41.86                                  | 6                |
| Pd <sub>0.8</sub> Au <sub>0.2</sub> /UiO-66-(NH <sub>2</sub> ) <sub>2</sub> | 25     | FA/SF    | 980 <sup>a#</sup>        | 41.86                                  | 6                |
| Pd <sub>1</sub> Co <sub>0.7</sub> /g-C <sub>3</sub> N <sub>4</sub>          | 75     | FA/SF    | 1193 <sup>a*</sup>       | --                                     | 7                |
| Pd <sub>1</sub> Ni <sub>1.3</sub> /N-C                                      | 65     | FA/SF    | 2195 <sup>a#</sup>       | 27.6                                   | 8                |
| PdNi@Pd/GNs-CB                                                              | 25     | FA/SF    | 577 <sup>b#</sup>        | --                                     | 9                |
| Pd <sub>0.9</sub> Co <sub>0.1</sub> /C <sub>650</sub>                       | 60     | FA/SF    | 8117 <sup>a#</sup>       | 47.73                                  | 10               |
| <b>Pd<sub>0.95</sub>Ni<sub>0.05</sub>/KB<sub>LA</sub></b>                   | 30     | FA/SF    | <b>1522<sup>a*</sup></b> | <b>45.59</b>                           | <b>This work</b> |
|                                                                             | 40     |          | <b>3187<sup>a*</sup></b> |                                        |                  |
|                                                                             | 50     |          | <b>5432<sup>a*</sup></b> |                                        |                  |
|                                                                             | 60     |          | <b>7714<sup>a*</sup></b> |                                        |                  |

<sup>a</sup> TOF values calculated on total metal atoms.

<sup>b</sup> TOF values calculated on surface metal sites or active sites.

<sup>#</sup> Initial TOF values calculated on initial time or initial conversion of FA.

<sup>\*</sup> TOF values calculated on the complete time of gas releasing.

- of Hydrogen Energy*, 2020, **45**, 12849-12858.
2. N. Gao, R. Ma, X. Wang, Z. Jin, S. Hou, W. Xu, Q. Meng, J. Ge, C. Liu and W. Xing, *International Journal of Hydrogen Energy*, 2020, **45**, 17575-17582.
  3. M. Navlani-García, K. Mori, A. Nozaki, Y. Kuwahara and H. Yamashita, *Industrial & Engineering Chemistry Research*, 2016, **55**, 7612-7620.
  4. M. Yao, Y. Ye, H. Chen and X. Zhang, *Materials Letters*, 2020, **264**, 127308
  5. Q. Tang, X. Zhou, J. Liu, M. Wu, H. Ji, Q. Wang, G. Li, H. Cong and Y. Qin, *International Journal of Hydrogen Energy*, 2022, **47**, 21745-21752.
  6. R.-D. Ding, Y.-L. Li, F. Leng, M.-J. Jia, J.-H. Yu, X.-F. Hao and J.-Q. Xu, *ACS Applied Nano Materials*, 2021, **4**, 9790-9798.
  7. M. Navlani-García, D. Salinas-Torres, K. Mori, Y. Kuwahara and H. Yamashita, *International Journal of Hydrogen Energy*, 2019, **44**, 28483-28493.
  8. R. Tamarany, D. Y. Shin, S. Kang, H. Jeong, J. Kim, J. Kim, C. W. Yoon and D. H. Lim, *Phys Chem Chem Phys*, 2021, **23**, 11515-11527.
  9. Y. L. Qin, J. Wang, F. Z. Meng, L. M. Wang and X. B. Zhang, *Chem Commun (Camb)*, 2013, **49**, 10028-10030.
  10. J. Wu, J. Zuo, K. Liu, J. Lin and Z. Liu, *Catalysis Letters*, 2022, **170**, 1-10.
